# Supplementary material
Source: Springer Nature journal article supplement (https://www.springermedizin.de/resource/supplementary/12889_2010_3038_MOESM3_ESM.pdf/9487928)
Supplement: MOESM3 [file 9487928]

Identification

Papers found from database searches (n = 23,756)

Papers found from hand searches (n = 7)  
Working Papers /handbooks/users guides (n=5)  
Unpublished papers (n=1)  
Book chapter (n=1)

Total papers found from search (n=23,763)

Screening

Excluded: Trials, case reports/series & non-population-based cohort studies (n=18,774)

Excluded: Recruitment only (n=3,739)

Potentially relevant prospective population-based cohort studies (n=1,250)

Eligibility

Excluded (n=723)  
No information on retention strategies (n=677)  
No information on follow-up (n=46 )

Papers retrieved for further evaluation (n=527)

Included

Excluded from review (n=495)  
No evaluation of retention strategies (n=475)  
Reviews (n=13)  
Tracing methods only (n=7)

Included papers (n=32)
